# Establishment of signaling interactions with cellular resolution for every cell cycle of embryogenesis

Long Chen<sup>1#</sup>, Vincy Wing Sze Ho<sup>2#</sup>, Ming-Kin Wong<sup>2#</sup>, Xiaotai Huang<sup>3#</sup>, Lu-yan Chan<sup>2</sup>, Hon Chun Kaoru Ng<sup>2</sup>, Xiaoliang Ren<sup>2</sup>, Hong Yan<sup>1</sup> & Zhongying Zhao<sup>2,4\*</sup>

<sup>1</sup>Department of Electronic Engineering, City University of Hong Kong, Hong Kong, China; <sup>2</sup>Department of Biology, Hong Kong Baptist University, Hong Kong, China; <sup>3</sup>School of Computer Science and Technology, Xidian University, Xi'an, China; <sup>4</sup>State Key Laboratory of Environmental and Biological Analysis, Hong Kong Baptist University, Hong Kong, China

<sup>#</sup>Co-first author

<sup>\*</sup>Corresponding author

Zhongying Zhao, Ph. D.  
Department of Biology  
State Key Laboratory of Environmental and Biological Analysis  
Hong Kong Baptist University, Hong Kong

Email: zyzhao@hkbu.edu.hk

Phone: +852-3411-7058

**Running title:** Establishment of signaling interactions with cellular resolution

**Keywords:** Cell contact, Notch signaling, Cell lineage, *C. elegans*, division asymmetry

29

## 30 **Abstract**

31

32 Intercellular signaling interaction plays a key role in breaking fate symmetry during animal  
 33 development. Identification of the signaling interaction at cellular resolution is technically  
 34 challenging, especially in a developing embryo. Here we develop a platform that allows automated  
 35 inference and validation of signaling interaction for every cell cycle of *C. elegans* embryogenesis.  
 36 This is achieved by generation of a systems-level cell contact map that consists of 1,114 highly  
 37 confident intercellular contacts by modeling analysis and is validated through cell membrane  
 38 labeling coupled with cell lineage analysis. We apply the map to identify cell pairs between which  
 39 a Notch signaling interaction takes place. By generating expression patterns for two ligands and  
 40 two receptors of Notch signaling pathway with cellular resolution using automated expression  
 41 profiling technique, we are able to refine existing and identify novel Notch interactions during *C.*  
 42 *elegans* embryogenesis. Targeted cell ablation followed by cell lineage analysis demonstrates the  
 43 roles of signaling interactions over cell division in breaking fate symmetry. We finally develop a  
 44 website that allows online access to the cell-cell contact map for mapping of other signaling  
 45 interaction in the community. The platform can be adapted to establish cellular interaction from any  
 46 other signaling pathways.

47

## 48 Introduction

49 Symmetry breaking in cell division timing and cell fate specification has long been a focus of  
50 developmental biology. Intercellular signaling plays a key role in breaking these symmetries  
51 (Yochem *et al.* 1988; Sawa 2012; Clevers and Nusse 2012; Greenwald 2013; Zacharias *et al.* 2015)  
52 although maternal control is critical for establishing polarity during early development (Rose and  
53 Gonczy 2014). For example, a Notch signaling interaction is necessary for fate asymmetry between  
54 cells ABa and ABp (Mickey *et al.* 1996; Priess 2005); whereas a Wnt interaction is required for  
55 both fate asymmetry and division asynchrony between cells EMS and P2 in a four-cell  
56 *Caenorhabditis elegans* embryo (Rocheleau *et al.* 1997). The Notch interaction is achieved by a  
57 contact between the P2 that expresses a Notch ligand, *apx-1*, and the ABp but not the ABa cell,  
58 although both the later cells express Notch receptor, *glp-1* (Mickey *et al.* 1996). This demonstrates  
59 that a contact between cells is essential for triggering a signaling interaction to drive differential  
60 fate specification (Good *et al.* 2004). A similar scenario is observed for the Wnt interaction between  
61 the EMS and the P2 cells, which is necessary for asymmetric division of the former into MS and E  
62 cells during *C. elegans* embryogenesis (Goldstein 1992; Rocheleau *et al.* 1997). Notably, the two  
63 pathways are used repeatedly throughout development in a cellular context-dependent fashion to  
64 establish further asymmetries in fate specification or division timing (Huang *et al.* 2007; Zacharias  
65 *et al.* 2015). For example, in a 12-cell *C. elegans* embryo, the four great-granddaughters of AB  
66 express Notch receptor, GLP-1, but only two of them, i.e., ABalp and ABara, are in contact with a  
67 Notch ligand-expressing cell, MS, leading to their differential differentiation into mesodermal and  
68 ectodermal fates, respectively (Hutter and Schnabel 1994; Shelton and Bowerman 1996).

69 Importantly, signaling interactions from the same pathway may have an opposite consequence  
70 depending on their timing or cellular context. For example, the first Notch interaction inactivates  
71 its targets, *tbx-37/38* (Good *et al.* 2004); whereas the second one activates its targets including PHA-  
72 4, a FoxA transcription factor required for pharynx organogenesis (Priess 2005). These time-  
73 dependent signaling events indicate that dissecting signaling interactions with precise spatial and  
74 temporal resolution would be essential for a thorough understanding of symmetry breaking during  
75 metazoan development.

76 One of the biggest challenges in defining a signaling interaction during embryogenesis is the  
77 establishment of cell identity, especially in an embryo with a large number of cells (Keller *et al.*  
78 2008; Zacharias and Murray 2016). Another challenge is that one must have access to the cellular  
79 expression patterns of signaling molecules for each cell cycle. These requirements inhibit functional  
80 characterization of cellular signaling during rapid development. This is because defining a signaling  
81 interaction requires knowledge on the identities of cell pairs that are in contact with each other, with  
82 one expressing a ligand and the other a receptor.

83 The development of cell-tracking techniques using time-lapse 3D (hereafter referred to as 4D)  
84 microscopy has greatly facilitated cell lineage analysis (Schnabel *et al.* 1997, 2006, Zhao *et al.*  
85 2008, 2010b; Muzzey and van Oudenaarden 2009). In particular, a recently developed automated  
86 lineaging technique allows routine tracing of cell division and single-cell expression profiling in a  
87 *C. elegans* embryo up to 350 cells within approximately half an hour and up to the last round of  
88 cell division of embryogenesis in about one day (Bao *et al.* 2006; Murray *et al.* 2008; Richards *et*  
89 *al.* 2013; Du *et al.* 2014; Shah *et al.* 2017). This technique makes it possible to infer signaling

interaction at cellular resolution for every cell cycle (Fig. 1) because the output of automated lineaging contains quantitative positional information for nuclei of all cells for every minute during embryogenesis, thus allowing systematic modelling of cell contacts with exceptional spatial and temporal resolution. A cell contact map up to the ~150-cell stage was reported for the *C. elegans* embryo purely based on Voronoi modeling (Hench *et al.* 2009). However, the map suffers from several caveats. First, it was generated using a single “composite” embryo assembled from six different embryos, each of which was partially resolved for cell lineage. Given the variability in embryo size, shape, and developmental timing (Hara and Kimura 2009; Greenan *et al.* 2010; Moore *et al.* 2013; Ho *et al.* 2015), it would be problematic to superimpose the six embryos into a single embryo for modeling of cell contact. Second, a thorough validation of the modeling results was not performed. Many cell contacts that are brief in duration and/or have a minimal contact area may not be consequential. As a result, a relatively high false-positive rate is unavoidable without taking these issues into account. Finally, the map covers only the ~150-cell stage, but a *C. elegans* embryo does not hatch until it develops into 558 cells (Sulston *et al.* 1983). Therefore, a more reliable cell contact map that covers cells born at a later stage of embryogenesis is necessary for dissecting cell signaling. Here, we present a platform that allows the automated inference of cellular signaling for every cell cycle up to the ~350-cell *C. elegans* embryo. Applying the platform to Notch signaling pathway demonstrated a consecutive signaling events over cell cycles for breaking cell fate symmetry.

## Results

# **A time-lapse cell-contact map from 4- to 350-cell *C. elegans* embryo**

To facilitate the precise assignment of cell pairs between which a potentially functional signaling interaction takes place, we performed modeling analysis of cell-cell contact over the proliferative stage of *C. elegans* embryogenesis from 4 to 350 cells. Specifically, 4D coordinates from 91 wild-type embryos generated previously by automated lineaging (Ho *et al.* 2015) were individually used as an input for the Voronoi algorithm to model cell surfaces, from which the contacting area is computed between a cell pair (see Materials and Methods). Instead of using partial 4D coordinates from different embryos, as in a previous study (Hench *et al.* 2009), the 91 coordinate sets used here were each derived from single intact embryos, which minimizes the issues associated with normalization steps for cell size, embryo shape and developmental timing.

It is conceivable that many cell contacts may not be relevant to cell signaling due either to their short duration or small contact area. To increase the modeling accuracy, we adopted the following criteria to define an effective cell contact, which is referred to as cell contact hereafter for simplicity unless stated otherwise. First, a contact area is required to be at least 6.5% of the average cell surface areas of all cells present at the same time point (Fig. 2A). Second, this criterion must be satisfied for at least two consecutive time points (approximately 1.5 minutes per time point) (Fig. 2C, see details below). Third, these two criteria must be reproducible in at least 95% of the 91 wild-type embryos (i.e., in 87 of 91 embryos; Fig. 2B). As a result, we predicted a total of 1,114 cell contacts from the 4- to 350-cell stage (Table S1). The predicted contact areas were highly reproducible among the 91 embryos with a Pearson correlation coefficient ( $r$ ) of at least 0.8 between any two independent embryos (Fig. 2D). The predicted cell contact can be readily validated via ubiquitous

132 and simultaneous labeling of cell membranes and nuclei with resolved cell identities (Fig. 2E).

133 We adopted the criterion of a 6.5% contact area based on the well-established 2<sup>nd</sup> Notch interactions

134 in the *C. elegans* embryo (Mickey *et al.* 1996). This interaction occurs between a Notch ligand-

135 expressing cell MS and two Notch receptor-expressing cells ABalp and ABara in a 12-cell embryo,

136 but not in their sisters (ABala and ABarp), which leads to specification of their pharyngeal fate. We

137 first individually computed the contact areas between MS and each of the four AB descendants for

138 the 91 wild-type embryos. Given the variability in contact area between the embryos, we next

139 plotted the occurrence of the four contacts (any contact with a contacting area > 0) in the 91 embryos

140 against the ratio of actual contact area relative to average cell surface areas of all cells present at

141 the current time point. Occurrence distributions of both individual (Fig. S1) and aggregated (Fig.

142 2A) plots demonstrated a normal distribution. We observed a clear demarcation between cell pairs

143 with (between MS and ABala or ABarp) and without (between MS and ABalp or ABara) a

144 functional contact at a ratio of approximately 6.5% of the actual contact area relative to the average

145 cell surface area of all cells at the current time point (Fig. 2A). We therefore used the ratio of 6.5%

146 as a cutoff for defining an effective contact. Variability in actual cell contact was observed not only

147 between MS and the four AB descendants, but also in other cells from 4-350 cells in the 91 embryos

148 (Fig. 2B). Therefore, we require that only if a contact is reproducibly observed in 95% of all the 91

149 embryos, it can be defined as an effective contact. To further reduce our false-positive rate in calling

150 an effective cell contact, we require a contact that lasts for at least two consecutive time points

151 (approximately 3 minutes). We set this filter because our temporal resolution is 1.5 minutes,

152 meaning that the duration of any contact shorter than this will be assigned as 1.5 minutes. This

temporal requirement ensures that an effective cell contact lasts for at least 1.5 minutes.

A previous study suggested the substantial effect of pressure applied to an embryo during imaging on the prediction of cell-cell contact (Hench *et al.* 2009). We tested the effect of such pressure by examining whether the hatching rates are similar between pressured (mounted) and unpressurized (unmounted) embryos (those laid freely on an NGM plate). If the hatching rates are comparable, after the hatched larvae grow up, whether their brood sizes are comparable. We found that all mounted and unmounted embryos with 25 each hatched, and the brood sizes are also comparable between the mounted and unmounted embryos (Fig. S2), suggesting that pressure applied on the embryos for mounting was unlikely to have affects the important cell contacts during *C. elegans* embryogenesis.

163

#### 164 **Comparison of performance between our and a previous contact map**

A previous cell contact map was generated with a modeling algorithm similar to that used here but using a single “composite” embryo assembled from six different embryos(Hench *et al.* 2009). The cell lineage for each embryo was partially resolved owing to the difficulty in establishing cell identities on both sides of an embryo. Notably, the cell contact was defined mainly based on whether there is any physical contact regardless of the size and duration of a contact, making it prone to a relatively high false-positive rate. The spatial and temporal constrains we used for modeling are expected to reduce the rate of false positives.

To compare the performances between our and the previous contact maps, we contrasted a subset of cell contacts relevant to well-established Notch signaling interactions (Table 1). It was expected



174 that our modeling contacts would agree well with the contacts based on the 2<sup>nd</sup> Notch interactions  
 175 because they were used as a training set for our contact modeling. Notably, nearly one half of the  
 176 cell contacts predicted previously were false positive when compared with the experimentally  
 177 verified ones whereas our predictions agreed well with the experimental data from multiple Notch  
 178 interactions (Table 1), indicating that our modeling method substantially outperforms the previous  
 179 method in terms of accuracy.

180

# **181 Lineal expression of Notch receptors and ligands derived from a single-copy transgene**

182 Knowledge of the time-lapse expression of a ligand and its receptor of a signal pathway at the  
 183 cellular level with high temporal resolution is critical for assigning a cell pair between which a  
 184 signaling interaction takes place. However, such knowledge is either absent or present at poor  
 185 spatiotemporal resolution especially during the proliferative stage of embryogenesis, thus  
 186 preventing effective assignment of a signaling interaction. For example, existing expression  
 187 patterns on Notch pathway components in *C. elegans* were obtained through either a transgenic  
 188 study or antibody staining or their combination (Mello *et al.* 1994; Mickey *et al.* 1996; Moskowitz  
 189 and Rothman 1996). Most of the transgenic assays are based on extrachromosomal arrays  
 190 (Moskowitz and Rothman 1996) or biolistic bombardment (Murray *et al.* 2012). The expression  
 191 patterns generated from these transgenic strains may suffer from increased perdurance of  
 192 fluorescent reporter by extra copy of transgenes or uncertainty in regulatory sequences incorporated  
 193 into host cells.

194 To generate the embryonic expression pattern of a Notch component that more likely mimics its

195 native expression at cellular resolution for each cell cycle, we first produced multiple independent  
196 transgenic strains carrying a single copy of a fusion between GFP and a promoter sequence from a  
197 Notch component using the miniMos technique (Frokjaer-Jensen *et al.* 2014), including two  
198 functionally redundant receptors, *lin-12* and *glp-1*, and two ligands, *apx-1* and *lag-2*. A single strain  
199 that showed consistent expression with at least one another transgenic copy was used to map the  
200 reporter's lineal expression using automated lineaging and expression profiling technology (Murray  
201 *et al.* 2008). *glp-1* shows specific expression in the descendants of ABarpap and ABplaaa (Fig. 3A,  
202 B, G and J). These will generate hypodermal cells found in the head (Sulston *et al.* 1983). Dim  
203 expression was also observed in the descendants of MSaa and MSpa (Fig. S2A, F). Notably, our  
204 expression patterns are roughly comparable with those derived from the transgenic strains generated  
205 with biolistic bombardment in AB (Murray *et al.* 2012), but expression was observed in more cells  
206 in the bombardment strains. Because the promoter sequences are similar in size, it remains likely  
207 that the expression conferred by the single-copy transgene may be too dim to be seen. Expression  
208 of the other Notch receptor, *lin-12*, is mainly observed in the descendants of ABplp, ABprp and  
209 ABplaaa (Fig. 3C, D, H, J). No expression was observed in the P1 sublineage (Fig. S3B, G). One  
210 Notch ligand, *apx-1*, showed expression mainly in the descendants of ABala, ABpl(r)apaa (Fig. 3E,  
211 F, I, J), MSppapp and MSppppp (Fig. S3C, H). We did not observe the expression of *lag-2* in the  
212 ABalap descendants, as reported previously (Moskowitz and Rothman 1996). A complete list of  
213 cell expressing Notch ligands and receptors are shown in Table S2. When combined with the cell  
214 contact map, the lineal expression of these Notch components at a 1.5-minute interval over  
215 development will not only allow validation of existing Notch signaling interactions, especially at a

stage with tens to hundreds of cells, but it also holds promise for the identification of novel cell pairs between which a signaling interaction may take place. We illustrate the applications in detail below.

# **Refinement of the proposed cell pairs for 3<sup>rd</sup> Notch interaction in *C. elegans* embryo**

The 3<sup>rd</sup> Notch signaling between signaling cell ABalapp and signal-receiving cell ABplaaa was proposed mainly based on the expression timing of a Notch ligand, *lag-2*, in ABalapp and a Notch receptor, *lin-12*, in the ABplaaa (Moskowitz and Rothman 1996). To confirm the signaling interaction and examine its functional redundancy, we took advantage of our time-lapse cellular expression patterns of both Notch receptors and two different ligands and aligned them against our modeled cell contacts. If a cell contact is observed between two cells with one expressing a ligand and the other a receptor, it is plausible that a signaling interaction takes place between the two. In addition to *lag-2* (Moskowitz and Rothman 1996), we observed the expression of another Notch ligand, *apx-1*, in the descendants of ABala (Fig. 3E). Our reporter assay revealed that both Notch receptors, *lin-12* and *glp-1*, are expressed in the left head precursor, ABplaaa (Fig. 3B, D). Despite the expression of *apx-1* in all of the descendants of ABala (Fig. 3E), only one of the ABala daughters, ABalap, had cell contact with the left-head precursor, ABplaa, based on our modeling results (Table S1), suggesting a specific signaling interaction between the two, which is consistent with previous cell-ablation results (Hutter and Schnabel 1995; Moskowitz and Rothman 1996). Notably, expression of the Notch ligand *lag-2* and the Notch receptor *lin-12* by LacZ-based transgenic assay suggested the signaling interaction at a later stage (i.e., between ABalapp and ABplaaa) (Moskowitz

237 and Rothman 1996). However, our cell contact data suggest that ABalapa may play a bigger role  
 238 than ABalapp in signaling the left head precursor (Fig. 4). The three cells stay in different z planes  
 239 (Fig. 4A-C). Both daughters of ABalapa express *apx-1*, but the relative contact area with ABplaaa is  
 240 much greater for ABalapa (16.6%) than for ABalapp (5%) (Table S1). In addition, the daughters of  
 241 ABalapa, but not those of ABalapp, are in contact with those of the daughters of the left head  
 242 precursor (Movie S1), which further supports the more important role of ABalapa in signaling  
 243 ABplaaa than ABalapp. These results suggest that the signaling effect in cell fate specification is  
 244 achieved through consecutive signaling in multiple generations. It remains possible that two cells  
 245 signal ABplaaa redundantly. Our reporter assay also showed that both Notch receptors may be  
 246 redundantly involved in the signaling event, refining the previous finding that only a single ligand  
 247 and receptor are involved in the third signaling event (Moskowitz and Rothman 1996).

## 248

### 249 **Functional validation of the proposed cell pairs for the 3<sup>rd</sup> Notch interaction**

250 To experimentally validate the 3<sup>rd</sup> Notch interaction, we first used cell membrane labeling coupled  
 251 with cell lineage analysis (see Materials and Methods). Specifically, we performed 4D live-cell  
 252 imaging of a *C. elegans* embryo ubiquitously expressing a nuclear and a membrane marker from  
 253 the 4-cell stage up to the desired stage as estimated by wild-type lineaging trees (Ho *et al.* 2015).  
 254 We then took a single 3D stack consisting of 110 focal planes for both GFP (nuclear) and mCherry  
 255 (membrane) channels, which were rendered as a 3D projection (Fig. 4D). The 4D images allowed  
 256 manual or automated tracing of cell identities, whereas the 3D projection permitted establishment  
 257 of cell boundaries (Fig. 4 A-C). In agreement with our modeling results, the cell membrane labeling

258 showed a higher confidence of contact with the left-head precursor by cell ABalapa than by cell  
259 ABplapp (Fig. 4D-E). The contact seems not obvious in modeled cell boundaries (Fig. 4F). This  
260 may be mainly due to the positional differences across the z axis.

261 We next verified whether the predicted signaling cell functions as expected using cell ablation  
262 technique. Given that *apx-1* is expressed in all ABala descendants, we decided to test whether the  
263 signaling interaction takes place in multiple generations as stated above by a combination of cell  
264 ablation and Notch target expression. We first ablated the cell ABala and examined the expression  
265 of a Notch target, *ref-1*, that is known to be expressed in the precursors of both the left and right  
266 heads (Neves and Priess 2005; Murray *et al.* 2012) (Fig. 4 G-H, Fig. S4A). As expected, ablation  
267 of the cell led to the specific loss of *ref-1* expression in the left-head precursor (Fig. 4H, Fig. S4A,  
268 4A), demonstrating that the ligands expressed in this cell or its daughters are responsible for the  
269 signaling interaction. We next ablated the posterior daughter of ABala, ABalap, and re-examined  
270 the expression of *ref-1*. Interestingly, ablation of the cell abolished the *ref-1* expression in the  
271 posterior but not in the anterior descendants of ABplaaa (Fig. 4I and not shown), suggesting that  
272 some other signaling cell is responsible for the *ref-1* expression in the anterior descendants, or that  
273 the lost function in ABalap may be compensated by other ligand-expressing cells. We finally ablated  
274 the two daughters of ABalap (i.e., ABalapa and ABalapp). The former was proposed to be the  
275 signaling cell for ABlpaaa (Moskowitz and Rothman 1996), whereas our modeling and membrane  
276 labeling data supported a more important role for the latter in signaling ABplaaa (Fig. 4A-E).  
277 Unexpectedly, we observed that the *ref-1* expression in ABplaaa descendants after either ablation  
278 was comparable to that of the wild type (Fig. 4J and data not shown, Figs. S4, S5C-E, S6). Taken

279 together, our results suggest that the induction of left-head specification is achieved by a multiple  
280 round of signaling from consecutive cell cycles, which is especially true during the late stage of  
281 embryogenesis. The results also suggest redundant features of Notch signaling in regulating fate  
282 specification.

283

# **284 Identification of the proposed cell pairs for the 4<sup>th</sup> Notch signaling in *C. elegans* embryo**

285 Previous studies suggested that one or both of the MSap daughters are the signaling cell(s) for fate  
286 specification of ABplpapp, the great-grandparent of the excretory cell (a functional equivalent of  
287 the human kidney), but the exact identities of the signaling cells remain elusive (Moskowitz and  
288 Rothman 1996; Priess 2005). To establish the identity of the signaling cell, we first examined our  
289 modeling results on cell contact, which suggest that only one of the MSap daughters (i.e, MSapp  
290 but not MSapa) is in contact with the excretory cell precursor (Fig. 5, Table S1). Consistent with  
291 this, a 3D projection of labeled cell membranes showed that it is MSapp but not MSapa that is in  
292 contact with the ABplpapp cell (Fig. 5A-D, Movie S2). To further validate the interaction between  
293 the two cells, we examined the lineal expression of both Notch ligands and receptors. We observed  
294 that one Notch receptor, *lin-12*, was expressed in all descendants of ABplp, the great-grandparent  
295 of ABplpapp (Fig. 3D). Consistent with our modeling results, the GFP reporter of one Notch ligand,  
296 *lag-2*, was specifically expressed in MSapp but not in MSapa (Fig. 5E, Fig. S3 D-E, I-J), further  
297 supporting that MSapp is the signaling cell for ABplpapp. Notably, one daughter of MSapp,  
298 MSappa, was also in contact with ABplpapp, indicating that the signaling interaction is further  
299 relayed in the next cell cycle.

300

# 301 **Evidences of Notch signaling in later AB descendants**

302 The transcription factor *pal-1* is expressed in ABplppppp, the grandparent of the anal depressor  
 303 muscle and an intestinal muscle, and appears to be a direct target of Notch signaling required for  
 304 rectal development (Edgar *et al.* 2001). The signaling cells for this interaction appear to be  
 305 descendants of MSapa or MSapp (Priess 2005), but the exact identities of the signaling cells remain  
 306 elusive. Our modeling results predicted a reproducible cell contact between MSapp and ABplppppp,  
 307 the parent of ABplppppp (Fig. 6D, Table S1). Cell membrane labeling and a space-filling model  
 308 support the contact between the two cells (Fig. 6A-D), but not between MSapa daughters and  
 309 ABplppppp (Table S1), demonstrating that MSapp is more likely to be the signaling cell for  
 310 ABplppppp that is required for *pal-1* expression in ABplppppp.

311 In a wild-type embryo of approximately the 300-cell stage, a contact between two bilaterally  
 312 symmetric AB descendants, ABplpapppp and ABprpapppp, appears to be required for a Notch  
 313 interaction for the former to develop into a neuron and a rectal epithelial cell (Bowerman *et al.*  
 314 1992). Our modeling results predicted a contact between the two cells with a high level of  
 315 confidence (Table S1). Lineal expression of a Notch receptor, *lin-12*, was observed in ABplpapppp  
 316 (Fig. 3D) although that expression of both of our Notch ligands was not observed in ABprpapppp,  
 317 suggesting other Notch ligands may be involved in the interaction.

318

# 319 **A web-based utility for access to the cell-cell contact data over *C. elegans* embryogenesis**

320 To facilitate the intuitive use of our cell contact map, we developed a webpage that allows online

query and navigation of cell contacts over embryogenesis (Fig. S7). One can access the contacts relevant to their cell of interest by searching for the cell name or by navigating through a lineage tree. The output will show all cells that are in contact with the cell of interest in a graphical representation in which the thickness of the bars is proportional to the predicted score of a specific contact. The website is accessible through the link: <http://cccm.bionetworks.ml/>.

## Discussion

Signaling interaction plays a key role in breaking of division symmetry during metazoan development. Accurate and systematic identification of the interactions at cellular resolution during development is critical for understanding molecular mechanism of symmetry breaking but is technically challenging (Zacharias *et al.* 2015). This is especially true during a late proliferative stage of embryogenesis due to the difficulties in establishing contacting cells and their identities (Bao *et al.* 2006; Richards *et al.* 2013). It is also challenging to generate the native expression dynamics of signaling molecules at cellular resolution for each cell cycle.

Here, we present an automated platform that allows accurate identification of signaling interactions at cellular resolution during the proliferative stage of *C. elegans* embryogenesis. This was achieved by a combination of computer modeling of cell contact, automated cell lineaging and single-cell gene expression profiling. The cell contact map calibrated with both membrane labeling and known signaling interactions lays a foundation for systematic identification of signaling interactions. Applying the platform in *C. elegans* not only allows validation and refinement of the existing Notch signaling interactions but also permits identification of multiple novel signaling interactions



especially during a relatively late embryonic stage. The method can be applied to the characterization of any other signaling interactions. It should be noted that the Voronoi modeling is an approximation of cell surface. Predicted interactions with a smaller surface area in contact may or may not be functionally relevant. Alternatively, some functional contacts might be missed out in our list due the empirical cutoff we used in the modeling process. Functional test is required for making a functional calling of a functional contact.

Although many existing fate specifications were proposed to be triggered by a single signaling event, our analyses suggest that fate specification may depend on multiple signaling interactions that take place consecutively across cell divisions. For example, though our cell contact data and membrane labeling results support that it is ABalapa that mediates the third Notch interaction (Fig. 4) instead of ABalapp as described previously (Moskowitz and Rothman 1996), ablation of either ABalapa or ABalapp doesn't affect *ref-1* expression in ABplaaa descendants. We propose that the relay of signaling interactions over multiple generations may be a common practice for breaking of division symmetry as suggested earlier based on lineal expression of Wnt components (Zacharias *et al.* 2015). Alternatively, the interaction might be very brief. Once the signaling cell is born the signaling event might happen very quickly and ablation of that cell soon after its birth might not be enough to block the signaling interaction. We also observed frequent redundancy of signaling interactions which may serve to increase the robustness of a developmental process.

All of the expression patterns for Notch ligands and receptors are derived from a fusion between their promoter sequences and GFP with a heterogeneous 3' UTR from *his-72*. Therefore, these vectors may capture only the zygotic but not maternal expression (Murray *et al.* 2008). In addition,

the arbitrarily chosen fragment may not necessarily contain all of the functional elements required to drive its native expression. Because all of the expression patterns are derived from a single-copy transgene, some of them may be too dim to be detectable. Therefore, certain expressing cells or stages may be missing in our dataset. For example, the expression of *lag-2* was seen in ABala descendants by extrachromosomal array (Moskowitz and Rothman 1996), but not in our transgenic strain (Fig. S3 D-E), which could be because the expression driven by a single-copy transgene is too dim to be detected or because some *cis*-elements are lacking in the promoter used. Use of a brighter reporter, for example, Ruby3 (Bajar *et al.* 2016), may facilitate the visualization of single-copy transgenes. In summary, we present a new map of cell-cell contacts in *C. elegans* embryogenesis. We applied the map together with 4D imaging-based cell lineage analysis to refine previously described cell inductions. We finally develop a website that potentially becomes a valuable resource to the *C. elegans* community for intuitive and easy access to cell-cell contacts.

## Materials and Methods

### Modeling of cell-cell contact

Prediction of cell surface is performed using the Voronoi segmentation algorithm (Franz Aurenhammer 1991; Atsuyuki Okabe, Barry Boots 2000) with the "Voro++" library (Rycroft 2009) using the output from StarryNite as an input, which contains 3D coordinates for all nuclei at a 1.5-minute interval from 4 to 350 cells of a *C. elegans* embryo. One caveat of the method is the segmentation of the cells located at the edge of an embryo, where a false positive cell contact may

384 be predicted as reported previously (Hench *et al.* 2009). To solve this issue, for each embryo, a 3D  
 385 convex hull was generated as a proxy for embryo boundary. Given the reproducible migration of  
 386 cells at the embryo boundary, cell surface and contact areas were computed with cells' coordinates  
 387 and the 3D convex hull with "Voro++".  
 388 3D coordinates from 91 wild-type *C. elegans* embryos were individually modeled to define cell  
 389 contacts for each time point (1.5 minute) for all embryos. To evaluate the variability of cell contacts  
 390 among embryos, cell contact areas were compared against each embryo using "cell stage", i.e., the  
 391 number of cells in a given embryo, rather than the absolute developmental time. This would  
 392 minimize the complications associated with variability in developmental timing.

393

#### 394 **Visualization of cell boundary at desired stage**

395 A strain ZZY0535 was made by crossing the lineaging strain RW10029 expressing GFP lineaging  
 396 markers with strain OD84 expressing a membrane marker, *Ppie-1::mCherry::PH* (PLC1delta1) (see  
 397 Table S3). The three markers were rendered triply homozygous.

398 For visualization of cell contact by fluorescence membrane labeling, a 4-cell embryo with desired  
 399 developmental timing was selected for 4D imaging with a Leica SP5 confocal microscope using  
 400 the similar settings as those used for automated lineaging till the embryo developed to the desired  
 401 stage. Timing for presence of a cell of interest was estimated based on our lineaging results of the  
 402 91 wild-type embryos (Ho *et al.* 2015). Imaging with live data mode was switched to normal mode  
 403 to take a single stack consisting of 110 focal planes with suitable AOTF compensation using a  
 404 pinhole of 1.6 AU and three-line accumulation. Images were acquired from both GFP and mCherry

405 channels. Identity of the cell of interest was resolved by manually navigating through the image  
406 stacks using Leica Application Suite X (LAS X). The 3D stack of the embryo was used to  
407 reconstruct the 3D volume projection with LAS X. The embryo was rotated to a proper orientation  
408 to facilitate visualization of the desired cell boundary. Part of the embryo was cut open across  
409 different axes for visualization of contact.

410

#### 411 **Cell ablation coupled with cell lineage analysis**

412 For cell ablation coupled with automated lineaging, a 4-cell embryo with desired orientation was  
413 selected for 4D-imaging till the cell targeted for ablation was born. Manual tracing of the targeting  
414 cell was performed with the help of the lineaging markers. Immediately after the target cell  
415 completed mitosis, imaging was terminated and the following procedures were performed within  
416 1.5 minutes: switch the imaging mode from live data mode to normal mode; focus on the middle  
417 plane of the target cell nucleus by fine-tuning the Z-Galvo; select the bleaching point from the panel  
418 and create a region of interest (ROI) in the middle of the target cell nucleus in a preview panel; turn  
419 off all the fluorescence detectors except the one for the DIC and switch the filter to "Substrate"; set  
420 the bleaching time (40 seconds for ABala, 20 seconds for all others); temporally close the shutters  
421 for all the wavelengths except the pulsed diode laser (PDL 800-B, PicoQuant), which emits 405nm  
422 laser beam; tune it to 100% intensity and start the bleaching; and once completed, switch back to  
423 the live data mode and resume the 4D-imaging as usual.

424

#### 425 **Generation of single-copy transgenic lines**

Single-copy transgene consisting of a fusion between the promoter of a Notch ligand/receptor and GFP was generated using miniMos technique(Frokjaer-Jensen *et al.* 2014). The primer sequences used for amplifying the promoter sequences were listed in Table S4. The miniMos targeting vector pCFJ909 was modified to include a genomic coding region of *his-24* upstream of the GFP coding sequence to facilitate nuclear localization for automated lineal expression profiling as described(Zhao *et al.* 2010c). Multiple independent strains were produced for each promoter. A single strain that shows expression patterns consistent with the remaining ones was genotyped by inverse PCR and crossed with the lineaging strain RW10226. Both lineaging and Notch markers were rendered homozygous for automated lineaging and lineal expression profiling as described(Zhao *et al.* 2010c).

436

#### 437 **4D live cell imaging, automated lineaging and profiling of lineal gene expression**

Imaging was performed in the similar way to that described previously(Shao *et al.* 2013). Briefly, lineaging strain, RW10226(Zhao *et al.* 2010a), ubiquitously expressing nuclear mCherry, was crossed with the strain expressing a fusion between the promoter of a Notch component and GFP. Both the lineaging markers and the promoter fusion were rendered homozygous before lineaging. 4D imaging stacks (roughly 0.7  $\mu\text{m}$ /stack) were sequentially collected for both GFP and RFP (mCherry) channels at a 1.5-minute interval for a total of 240 time points using a Leica SP5 confocal microscope as described(Shao *et al.* 2013). Automated profiling of lineal expression was performed as described(Zhao *et al.* 2010c).

446

## 447 **Worm strains and maintenance**

448 All the animals were maintained on NGM plates seeded with OP50 at room temperature unless  
449 stated otherwise. The genotypes of the strains used in this paper were listed in Table S3.

450

## 451 **Acknowledgements**

452 We thank Mr. WS Chung for logistic support and helpful discussion with the members of Z Zhao's  
453 laboratory. This work is supported by the Hong Kong Research Grants Council (Project numbers  
454 HKBU5/CRF/11G, HKBU263512 and HKBU12103314) and HKBU Faculty Research Fund  
455 (FRG2/13-14/063), HKBU Strategic Development Fund for Environmental Genetics and the  
456 National Natural Science Foundation of China (Project 61702396) and the China Postdoctoral  
457 Science Foundation (Project 2016M600769). Some of the strains used in this study were provided  
458 by *C. elegans* Genetic Center, which is funded by NIH Office of Research Infrastructure Programs  
459 (P40 OD010440).

460

## 461 **Author contributions**

462 L.C modeled the cell contacts and H.C.K.N contributed to the dataset. M.K.W generated 3D  
463 projections of membrane-labeling and performed cell ablation. V.W.S.H, L.Y.C and X.R made the  
464 transgenic strains and produced lineal expressions. H.Y and Z.Z conceived the project. L.C and Z.Z  
465 wrote the manuscript.

466

## 467 **References**

468 Atsuyuki Okabe, Barry Boots K. S. & S. N. C., 2000 *Spatial Tessellations—Concepts and*  
469 *Applications of Voronoi Diagrams*. John Wiley.

470 Bajar B. T., Wang E. S., Lam A. J., Kim B. B., Jacobs C. L., *et al.*, 2016 Improving brightness and  
471 photostability of green and red fluorescent proteins for live cell imaging and FRET reporting.  
472 Sci. Rep. 6: 20889.

473 Bao Z., Murray J. I., Boyle T., Ooi S. L., Sandel M. J., *et al.*, 2006 Automated cell lineage tracing  
474 in *Caenorhabditis elegans*. Proc Natl Acad Sci U S A 103: 2707–2712.

475 Bowerman B., Tax F. E., Thomas J. H., Priess J. R., 1992 Cell interactions involved in development  
476 of the bilaterally symmetrical intestinal valve cells during embryogenesis in *Caenorhabditis*  
477 *elegans*. Development 116: 1113–22.

478 Clevers H., Nusse R., 2012 Wnt/ $\beta$ -Catenin Signaling and Disease. Cell 149: 1192–1205.

479 Du Z., Santella A., He F., Tionson M., Bao Z., 2014 De Novo Inference of Systems-Level  
480 Mechanistic Models of Development from Live-Imaging-Based Phenotype Analysis. Cell 156:  
481 359–372.

482 Edgar L. G., Carr S., Wang H., Wood W. B., 2001 Zygotic Expression of the caudal Homolog pal-  
483 1 Is Required for Posterior Patterning in *Caenorhabditis elegans* Embryogenesis. Dev. Biol.  
484 229: 71–88.

485 Franz Aurenhammer, 1991 Voronoi Diagrams—A Survey of a Fundamental Geometric Data  
486 Structure. ACM Comput. Surv. 23: 345–405.

487 Frokjaer-Jensen C., Davis M. W., Sarov M., Taylor J., Flibotte S., *et al.*, 2014 Random and targeted  
488 transgene insertion in *Caenorhabditis elegans* using a modified Mos1 transposon. Nat.

489       Methods 11: 529–534.

490       Goldstein B., 1992 Induction of gut in *Caenorhabditis elegans* embryos. *Nature* 357: 255–257.

491       Good K., Ciosk R., Nance J., Neves A., Hill R. J., *et al.*, 2004 The T-box transcription factors TBX-

492       37 and TBX-38 link GLP-1/Notch signaling to mesoderm induction in *C. elegans* embryos.

493       Development 131: 1967–78.

494       Greenan G., Brangwynne C. P., Jaensch S., Gharakhani J., Julicher F., *et al.*, 2010 Centrosome size

495       sets mitotic spindle length in *Caenorhabditis elegans* embryos. *Curr. Biol.* 20: 353–358.

496       Greenwald I., 2013 Notch signaling: genetics and structure. *WormBook*: 1–28.

497       Hara Y., Kimura A., 2009 Cell-Size-Dependent Spindle Elongation in the *Caenorhabditis elegans*

498       Early Embryo. *Curr. Biol.* 19: 1549–1554.

499       Hench J., Henriksson J., Luppert M., Burglin T. R., 2009 Spatio-temporal reference model of

500       *Caenorhabditis elegans* embryogenesis with cell contact maps. *Dev. Biol.* 333: 1–13.

501       Ho V. W., Wong M. K., An X., Guan D., Shao J., *et al.*, 2015 Systems-level quantification of

502       division timing reveals a common genetic architecture controlling asynchrony and fate

503       asymmetry. *Mol. Syst. Biol.* 11: 814.

504       Huang S., Shetty P., Robertson S. M., Lin R., 2007 Binary cell fate specification during *C. elegans*

505       embryogenesis driven by reiterated reciprocal asymmetry of TCF POP-1 and its coactivator -

506       catenin SYS-1. *Development* 134: 2685–2695.

507       Hutter H., Schnabel R., 1994 *glp-1* and inductions establishing embryonic axes in *C. elegans*.

508       Development 120: 2051–2064.

509       Hutter H., Schnabel R., 1995 Specification of anterior-posterior differences within the AB lineage



510 in the *C. elegans* embryo: a polarising induction. *Development* 121: 1559–1568.

511 Keller P. J., Schmidt A. D., Wittbrodt J., Stelzer E. H., 2008 Reconstruction of zebrafish early  
512 embryonic development by scanned light sheet microscopy. *Science* (80-. ). 322: 1065–1069.

513 Mello C. C., Draper B. W., Priess J. R., 1994 The maternal genes *apx-1* and *glp-1* and establishment  
514 of dorsal-ventral polarity in the early *C. elegans* embryo. *Cell* 77: 95–106.

515 Mickey K. M., Mello C. C., Montgomery M. K., Fire A., Priess J. R., 1996 An inductive interaction  
516 in 4-cell stage *C. elegans* embryos involves APX-1 expression in the signalling cell.  
517 *Development* 122: 1791–8.

518 Moore J. L., Du Z., Bao Z., 2013 Systematic quantification of developmental phenotypes at single-  
519 cell resolution during embryogenesis. *Development* 140: 3266–3274.

520 Moskowitz I. P., Rothman J. H., 1996 *lin-12* and *glp-1* are required zygotically for early embryonic  
521 cellular interactions and are regulated by maternal GLP-1 signaling in *Caenorhabditis elegans*.  
522 *Development* 122: 4105–17.

523 Murray J. I., Bao Z., Boyle T. J., Boeck M. E., Mericle B. L., *et al.*, 2008 Automated analysis of  
524 embryonic gene expression with cellular resolution in *C. elegans*. *Nat. Methods* 5: 703–9.

525 Murray J. I., Boyle T. J., Preston E., Vafeados D., Mericle B., *et al.*, 2012 Multidimensional  
526 regulation of gene expression in the *C. elegans* embryo. *Genome Res.* 22: 1282–94.

527 Muzzey D., Oudenaarden A. van, 2009 Quantitative time-lapse fluorescence microscopy in single  
528 cells. *Annu. Rev. Cell Dev. Biol.* 25: 301–327.

529 Neves A., Priess J. R., 2005 The REF-1 family of bHLH transcription factors pattern *C. elegans*  
530 embryos through Notch-dependent and Notch-independent pathways. *Dev. Cell* 8: 867–879.

531 Priess J. R., 2005 Notch signaling in the *C. elegans* embryo. *WormBook* 2007/12/01: 1–16.

532 Richards J. L., Zacharias A. L., Walton T., Burdick J. T., Murray J. I., 2013 A quantitative model of  
533 normal *Caenorhabditis elegans* embryogenesis and its disruption after stress. *Dev. Biol.* 374:  
534 12–23.

535 Rocheleau C. E., Downs W. D., Lin R., Wittmann C., Bei Y., *et al.*, 1997 Wnt signaling and an  
536 APC-related gene specify endoderm in early *C. elegans* embryos. *Cell* 90: 707–716.

537 Rose L., Gonczy P., 2014 Polarity establishment, asymmetric division and segregation of fate  
538 determinants in early *C. elegans* embryos. *WormBook*: 1–43.

539 Rycroft C. H., 2009 VORO++: A three-dimensional Voronoi cell library in C++. *Chaos An*  
540 *Interdiscip. J. Nonlinear Sci.* 19: 41111.

541 Sawa H., 2012 Control of Cell Polarity and Asymmetric Division in *C. elegans*. In: *Current topics*  
542 *in developmental biology*, pp. 55–76.

543 Schnabel R., Hutter H., Moerman D., Schnabel H., 1997 Assessing normal embryogenesis in  
544 *Caenorhabditis elegans* using a 4D microscope: variability of development and regional  
545 specification. *Dev. Biol.* 184: 234–65.

546 Schnabel R., Bischoff M., Hintze A., Schulz A.-K., Hejnow A., *et al.*, 2006 Global cell sorting in the  
547 *C. elegans* embryo defines a new mechanism for pattern formation. *Dev. Biol.* 294: 418–31.

548 Shah P. K., Santella A., Jacobo A., Siletti K., Hudspeth A. J., *et al.*, 2017 An In Toto Approach to  
549 Dissecting Cellular Interactions in Complex Tissues. *Dev. Cell* 43: 530–540.e4.

550 Shao J., He K., Wang H., Ho W. S., Ren X., *et al.*, 2013 Collaborative regulation of development  
551 but independent control of metabolism by two epidermis-specific transcription factors in

552 Caenorhabditis elegans. J. Biol. Chem. 288: 33411–26.

553 Shelton C. A., Bowerman B., 1996 Time-dependent responses to glp-1-mediated inductions in early  
554 C. elegans embryos. Development 122: 2043–50.

555 Sulston J. E., Schierenberg E., White J. G., Thomson J. N., 1983 The embryonic cell lineage of the  
556 nematode Caenorhabditis elegans. Dev Biol 100: 64–119.

557 Yochem J., Weston K., Greenwald I., 1988 The Caenorhabditis elegans lin-12 gene encodes a  
558 transmembrane protein with overall similarity to Drosophila Notch. Nature 335: 547–550.

559 Zacharias A. L., Walton T., Preston E., Murray J. I., 2015 Quantitative Differences in Nuclear  $\beta$ -  
560 catenin and TCF Pattern Embryonic Cells in C. elegans. (PW Sternberg, Ed.). PLoS Genet. 11:  
561 e1005585.

562 Zacharias A. L., Murray J. I., 2016 Combinatorial decoding of the invariant C. elegans embryonic  
563 lineage in space and time. Genesis 54: 182–97.

564 Zhao Z., Boyle T. J., Bao Z., Murray J. I., Mericle B., *et al.*, 2008 Comparative analysis of  
565 embryonic cell lineage between Caenorhabditis briggsae and Caenorhabditis elegans. Dev.  
566 Biol. 314: 93–9.

567 Zhao Z., Flibotte S., Murray J. I., Blick D., Boyle T. J., *et al.*, 2010a New tools for investigating the  
568 comparative biology of Caenorhabditis briggsae and C. elegans. Genetics 184: 853–863.

569 Zhao Z., Flibotte S., Murray J. I., Blick D., Boyle T. J., *et al.*, 2010b New tools for investigating  
570 the comparative biology of Caenorhabditis briggsae and C. elegans. Genetics 184: 853–63.

571 Zhao Z., Boyle T. J., Liu Z., Murray J. I., Wood W. B., *et al.*, 2010c A negative regulatory loop  
572 between microRNA and Hox gene controls posterior identities in Caenorhabditis elegans.

573 PLoS Genet. 6: e1001089.

574

## 575 Supporting Information Legends

### 576 Supporting Tables

577 Table S1. List of cell pairs between which an effective cell contact is called.

578 Table S2. List of cells expressing Notch ligands or receptors.

579 Table S3. List of strains and its genotypes

580 Table S4. List of PCR primers for amplification of promoters for Notch ligands and receptors

581

### 582 Supporting Figures

583

584 Figure S1. Occurrence distribution of the ratio of modeled contact area between MS and ABalp (A)  
585 or ABara (B) relative to average total cell surface area at the current time point. Second Notch  
586 signaling interactions are well established between the two cell pairs.

587

588 Figure S2. Comparison of brood sizes between unmounted (non-pressurized control) and mounted  
589 (mounting under pressure) embryos. Shown are boxplots of brood sizes that were scored from eight  
590 adults for each group with the total number of counted embryos indicated.

591

592 Figure S3. Lineal and spatial expression of Notch components up to 350 cells. A-C. Lineal  
593 expression of two Notch receptors, *glp-1* (A) and *lin-12* (B), and a Notch ligand, *apx-1* (C), in P1  
594 sublineage. D-E. Lineal expression of a Notch ligand, *lag-2*, in ABa (D) and ABp (E) sublineage.  
595 F-I. Space-filling models showing spatial expression of the above four genes in a 350-cell *C.*  
596 *elegans* embryo. Brightness in red corresponds to expression intensity. J. Spatial expression of *lag-*  
597 *2* based on their lineal origins in a 350-cell *C. elegans* embryo. ABalaappaa, red; ABalapapaa, blue;  
598 ABalppaaaa, pink; ABalppaapa, yellow; ABalappaaa, green; MSapp descendants, cyan.

599

600 Figure S4. Lineal expression of *ref-1* in ABa sublineage of embryos before (A) or after (B-E) cell  
601 ablation. Names of the ablated cells are indicated in parenthesis with approximate ablation timing  
602 indicated by an arrow. Note a loss of *ref-1* expression in descendants of the ablated cells.

603

604 Figure S5. Lineal expression of *ref-1* in P1 sublineage of embryos before (A) or after (B-E) cell  
605 ablation. Programmed cell deaths are indicated with arrow.

606

607 Figure S6. Lineal expression of *ref-1* in ABa (A) or ABp (B) sublineages of embryos before (A) or  
608 after (B-E) ablation of ABalapp as indicated on the top of each lineage tree. Cell ablation is  
609 indicated by “arrowhead” and the left head precursor, ABplaaa, is indicated by “arrow”.

610

611

612 Figure S7. Screenshot of the output by searching website of *C. elegans* Cell-Cell Contact Map  
 613 (CCCCM) using cell “ABplaaa” as a query. The querying cell is highlighted in red while its  
 614 contacting cells in blue in both lineage tree (top, up to 350 cells) and network schematics (bottom).  
 615 Relative contact area is shown in proportional to the thickness of the bar connecting contacting  
 616 cells. Details of cell contact information are shown on the bottom right. Only contacts that satisfy  
 617 our threshold are shown. Cells can also be queried using by navigating lineage tree as shown in  
 618 bottom left.

619

620

621

## 622 **Supporting Movies**

623

624 Movie 1. A time-lapse movie showing the contacts between ABplaaa and ABalpap and those  
 625 between their daughters.

626

627 Movie 2. A time-lapse movie showing the contacts between excretory cell precursor, ABplpapp and  
 628 MSapp.

629

630

631

## Tables

Table 1. Comparison of our cell contact map with a previous map(Hench *et al.* 2009) and the contacting cell pairs with known Notch signaling interaction.

| Contacting cells | Notch* | Our map | Previous map(Hench <i>et al.</i> 2009) | Remarks               |
|------------------|--------|---------|----------------------------------------|-----------------------|
| MS->ABalp        | Yes    | Yes     | 8/8                                    | 2 <sup>nd</sup> Notch |
| MS->ABara        | Yes    | Yes     | 8/8                                    | 2 <sup>nd</sup> Notch |
| ABalapa->ABplaaa | Yes    | Yes     | 8/8                                    | 3 <sup>rd</sup> Notch |
| ABalapp->ABplaaa | Yes    | No#     | 8/8                                    | 3 <sup>rd</sup> Notch |
| MSapp->ABplpapp  | ?      | Yes     | 6/6                                    | 4 <sup>th</sup> Notch |
| MSapa->ABplpapp  | ?      | No      | 6/6                                    | 4 <sup>th</sup> Notch |
| MSapp->ABplpppp  | ?      | Yes     | 4/5                                    | 5 <sup>th</sup> Notch |
| MS->ABala        | No     | No      | 1/8                                    | 2 <sup>nd</sup> Notch |
| MS->ABarp        | No     | No      | 7/8                                    | 2 <sup>nd</sup> Notch |
| ABarp->ABala     | No     | No      | 7/8                                    | NA                    |
| ABalp->ABarp     | No     | No      | 6/8                                    | NA                    |
| ABpla->ABpra     | No     | No      | 0                                      | NA                    |
| ABplp->ABpra     | No     | No      | 5/8                                    | NA                    |

\* existing knowledge on Notch signaling; NA: not applicable; ? ambiguity in signaling cell identity.

# could be a false negative due to cutoff of contact area.

## Figure legends

Fig 1. Overview of a 350-cell stage *C. elegans* embryo. A. Nomarski micrograph of a *C. elegans* embryo of appropriate 350-cell stage. B. Epifluorescence micrograph showing superimposed nuclear expression patterns of lineaging markers (red) and a pharynx marker, PHA-4 (green). C. Superimposed micrograph from panels B and C. D. 3D space-filling model of a 350-cell embryo. Cells are differentially color-coded based on their lineal origins. E. Cell lineage tree up to 350-cell stage. Cell lineages are differentially colored based on cell fate except the undifferentiated cell fates that are colored in black.

Fig 2. Modeling of cell-cell contact during *C. elegans* embryogenesis. A. Demarcation of the ratio of contact areas between cells with and without a functional contact. Shown is the occurrence distribution of modeled contact areas between cell pairs that are known to have (green) or not to have (brown) the 2<sup>nd</sup> Notch (see main text) interactions in 91 embryos. Percentage of contact area out of average cell surface area of all cells in the current time point is plotted on x axis and the number of embryos with a given ratio out of 91 wild types on y axis. B. Distribution of any contacts (contact area >0) in 91 wild-type embryos. Y axis denotes the percentage of a given contact out of all observed contacts and x axis the observed times for a given contact out of 91 embryos. Contacts with over 95% reproducibility (i.e., observed in 87 out of 91 embryos) are shaded in red. C. A diagram showing the definition of effective cell contact with cell A over consecutive three time points. Contact area that is bigger or smaller than 6.5% of the average surface areas of all the cells is differentially colored in red and blue lines respectively. For a given cell pair, only cell contact



677 area that is over 6.5% for at least two consecutive time point (around 3 minutes) is defined as an  
 678 effective cell contact. D. Heat map of mutual Pearson correlation's coefficient ( $r$ ) of contact areas  
 679 for all cells between 91 individual wild- type embryos. Both horizontal and vertical axes denote the  
 680 coefficient of an individual embryo against another. E. An example of 40-cell *C. elegans* embryo  
 681 expressing GFP in nuclei and membrane marker PH in cell membrane (red).

682  
 683 Fig 3. Expression of Notch ligands and receptors in *C. elegans* embryo. A-F. Lineal expression (red)  
 684 of two Notch receptors, *glp-1* and *lin-12*, and one ligand, *apx-1*, in ABa and ABp lineage up to 350-  
 685 cell stage. G-I. Spatial expression of the three genes differentially color coded based on their lineal  
 686 origins. J. Combined spatial expression patterns of the three genes between ligand, *apx-1*, (red) and  
 687 the two receptors, *glp-1* and *lin-12* (green).

688  
 689 Fig 4. Refinement of 3<sup>rd</sup> Notch signaling interaction in a 55-cell *C. elegans* embryo. A-C.  
 690 Epifluorescence micrographs of different focal planes of the same *C. elegans* embryo (dorsal view  
 691 with anterior to the left) focusing on cell ABplaaa (plane 26), ABalapa (plane 51) and ABalapp  
 692 (plane 72), respectively, as indicated by arrowhead. Cell membranes and nuclei are colored in red  
 693 and green respectively. D. 3D projection of epifluorescence micrographs. E. Cut-open view of the  
 694 3D projection in panel D showing cell boundaries. The projection is orientated to facilitate  
 695 visualization of the cell boundaries. F. Modeling of cell boundaries in an embryo at approximately  
 696 the same stage as in panel D. Nuclei of ABalapa and ABalapp are colored in red and indicated with  
 697 an “a” and “p”, respectively, and the remaining nuclei colored in blue; ABplaaa nucleus is colored

698 in green. G-J. Lineal expression of Pref-1::mCherry in “ABp” lineage of a wild-type embryo (G)  
 699 or embryos with cell ablation (ablated cell indicated in parenthesis). Target cells of the 3<sup>rd</sup> Notch  
 700 signaling interaction are indicated with an arrowhead.

701

702 Fig 5. Refined 4<sup>th</sup> Notch signaling interaction in *C. elegans* embryo. A. Shown is a 3D projection  
 703 of epifluorescence micrograph of an 87-cell embryo with cell membranes labelled by mCherry (red)  
 704 and nuclei by GFP. One or both of MSap daughters were previously proposed to signal excretory  
 705 cell precursor, ABplpapp. The three cells are indicated with an arrowhead. B. Cut-open view of the  
 706 same embryo as in panel A showing cell boundaries. The embryo is oriented so that the boundaries  
 707 of interest are most obvious. C. Modeling of cell boundaries of the same embryo as in panel B with  
 708 the same three cells indicated with an arrowhead. ABplpapp is colored in green and two MSap  
 709 daughters in red and the remaining nuclei in blue. D. 3D space-filling model of an embryo at the  
 710 same stage as in panel A. Red: ABa; dark blue: ABp; light blue: MS; green: E; pink: C; brown: D;  
 711 yellow: P4. The same three cells as in panel A are indicated with an arrowhead. E. Lineal expression  
 712 of a Notch ligand, *lag-2*, in MSapp (red) indicated with an arrowhead. Cell death is indicated with  
 713 an “X”.

714

715 Fig 6. Identities of cells for fifth Notch signaling interaction in *C. elegans* embryo. A. 3D projection  
 716 of a 96-cell embryo with cell membranes and nuclei colored in red and green, respectively.  
 717 Signaling interaction was proposed to take place between two cells, MSapp (yellow arrowhead)  
 718 and ABplpppp (white arrow head). B. Cut-open view of the same embryo as in panel A showing

719 cell boundaries. C. 3D space-filling model of a 96-cell *C. elegans* embryo with cell pairs similarly  
720 color coded as in panel A. D. Modeling of cell boundaries in a 96-cell *C. elegans* embryo. Nuclei  
721 of MSapppp and ABplpppp are colored in red and green, respectively and the remaining nuclei in  
722 blue.  
723

# Figures

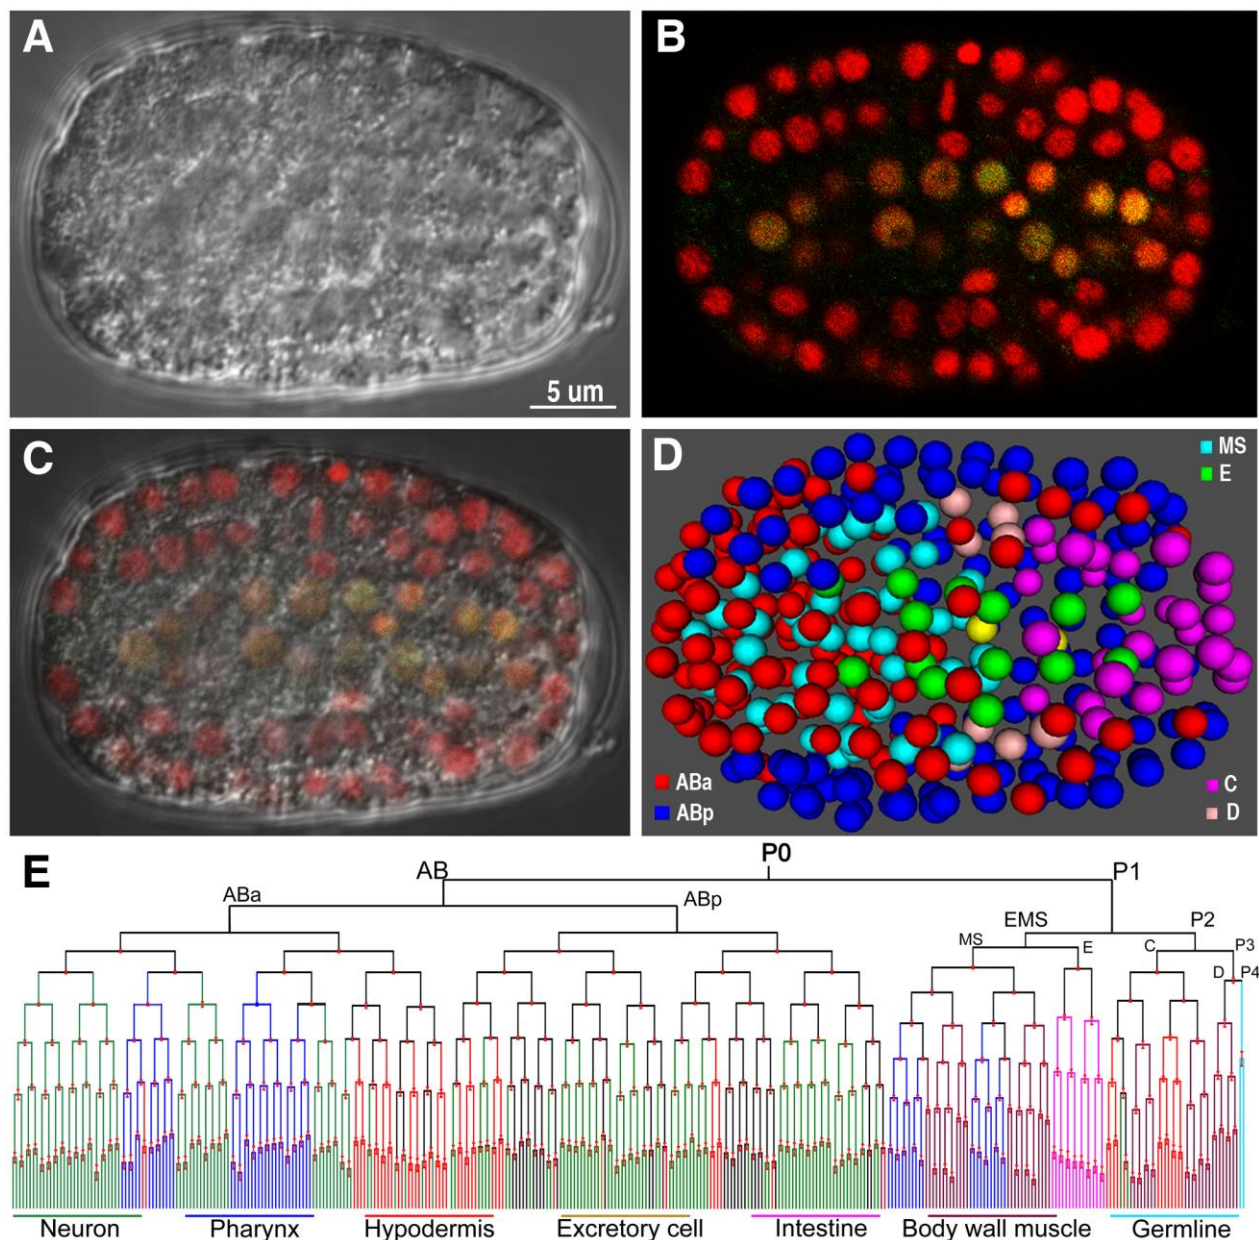

Fig. 1

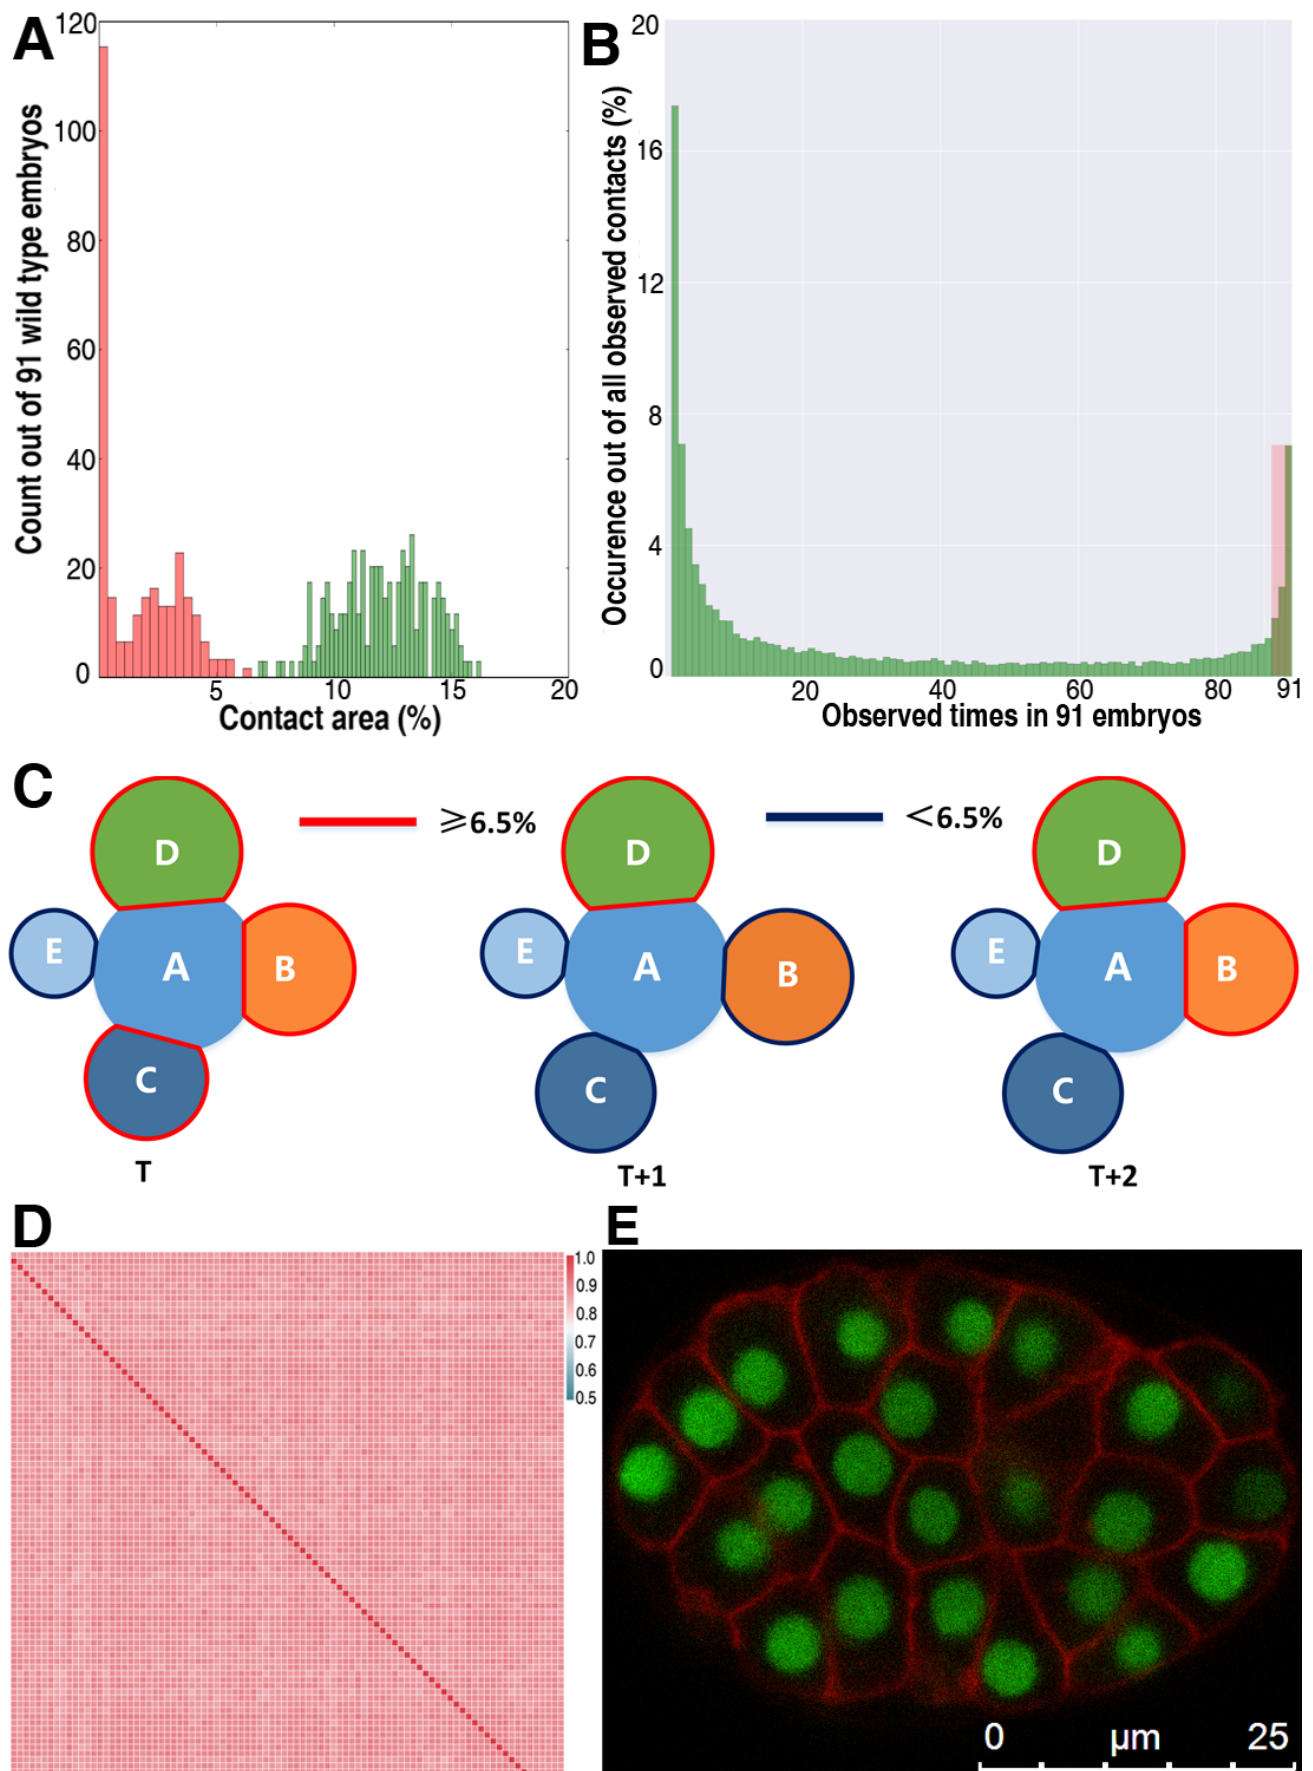

Fig. 2



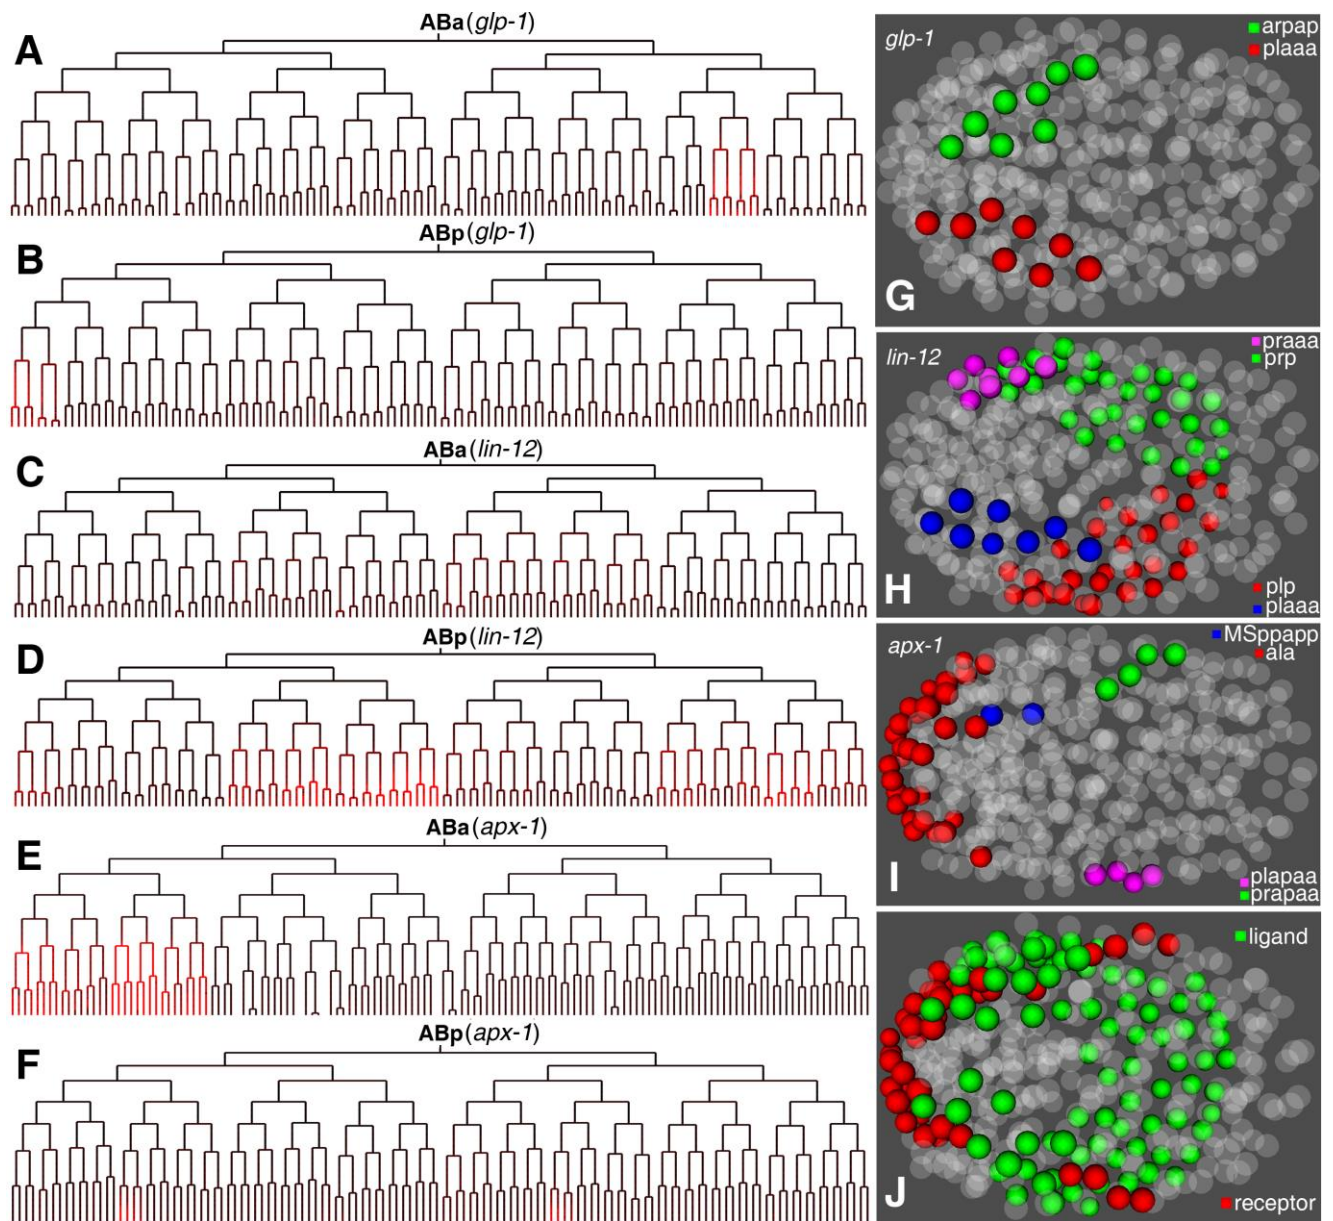

Fig. 3

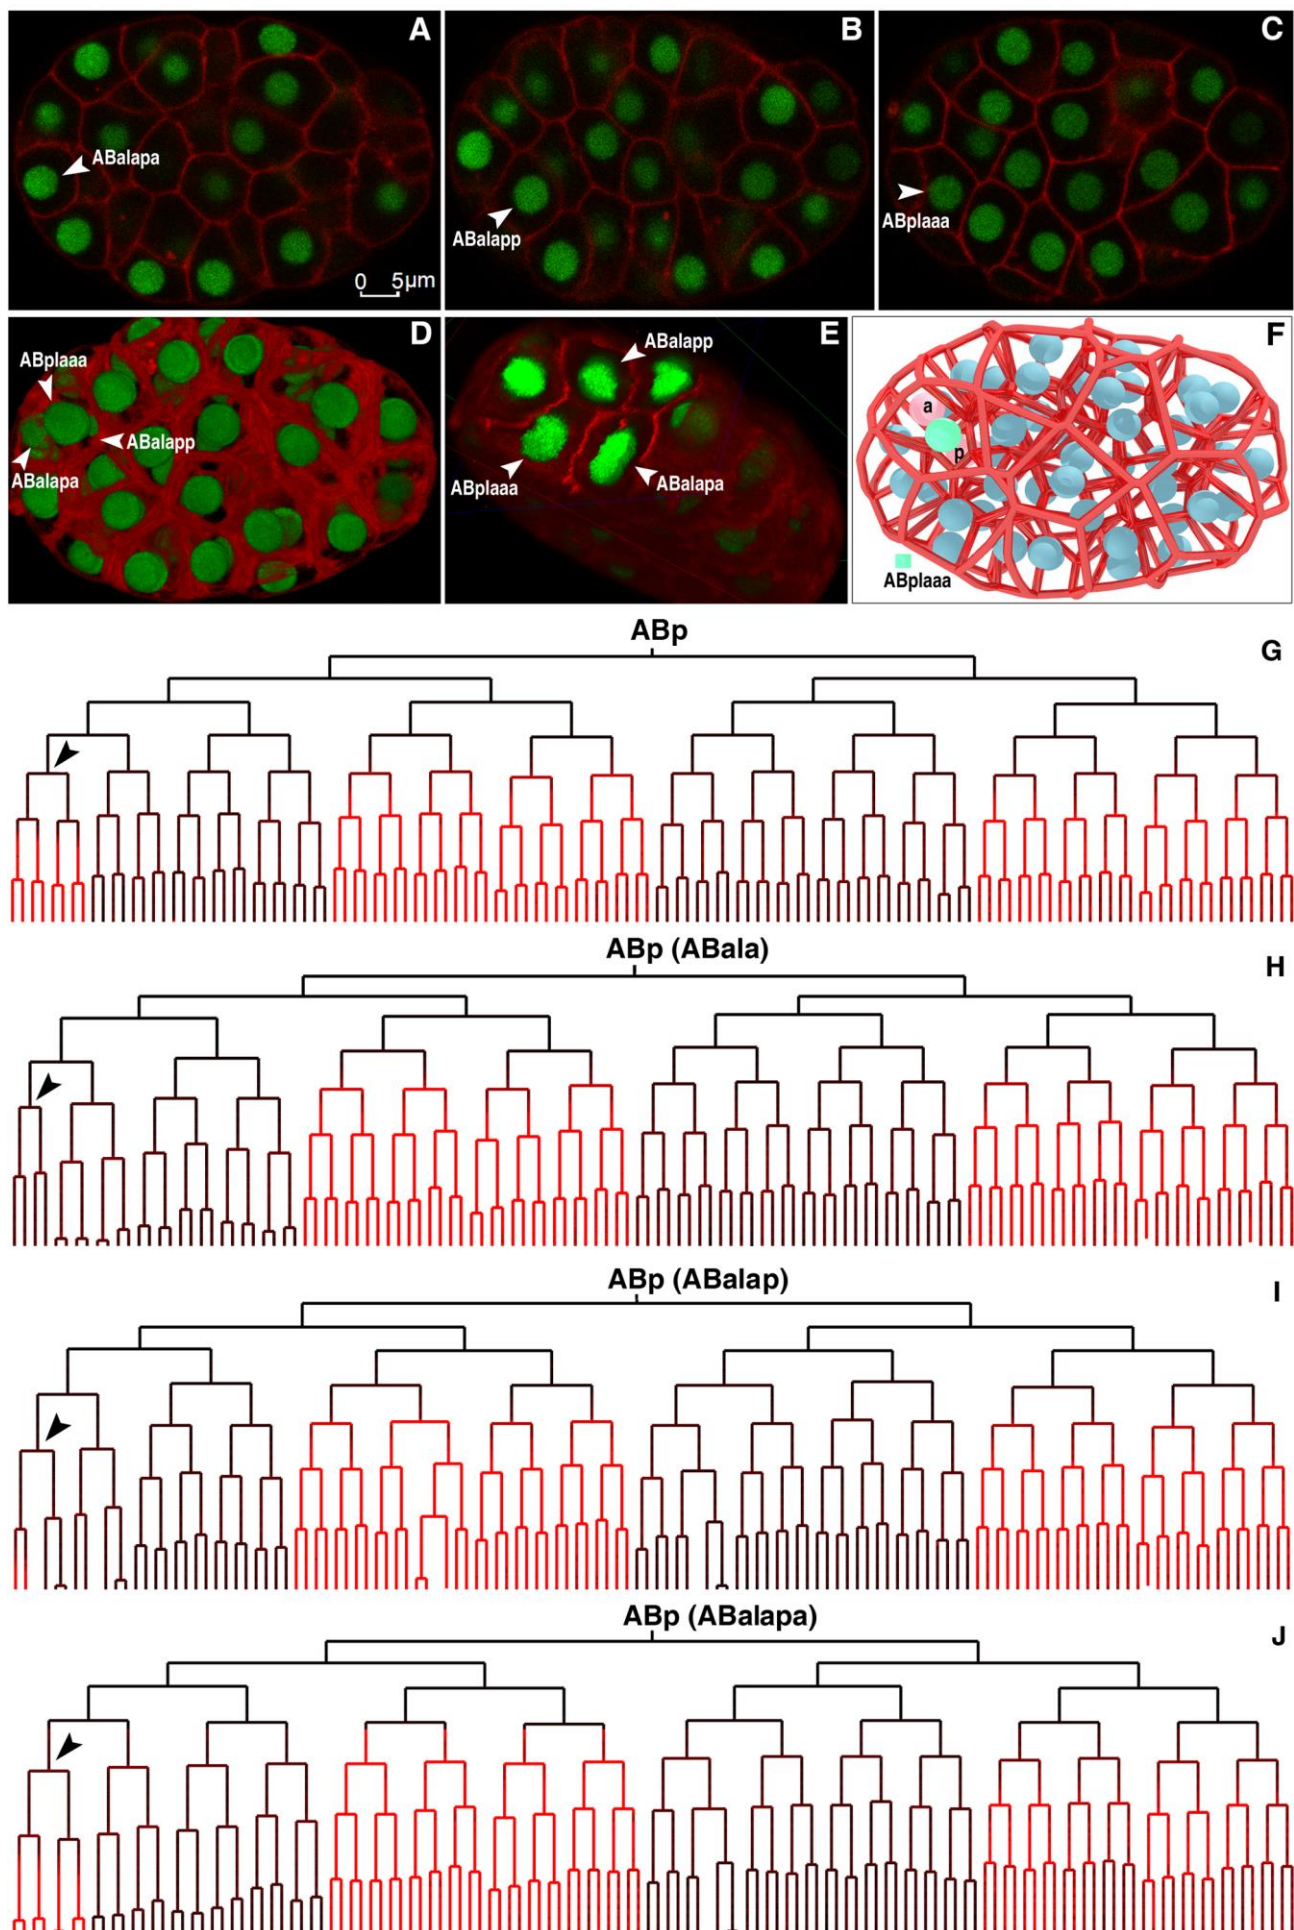

Fig. 4



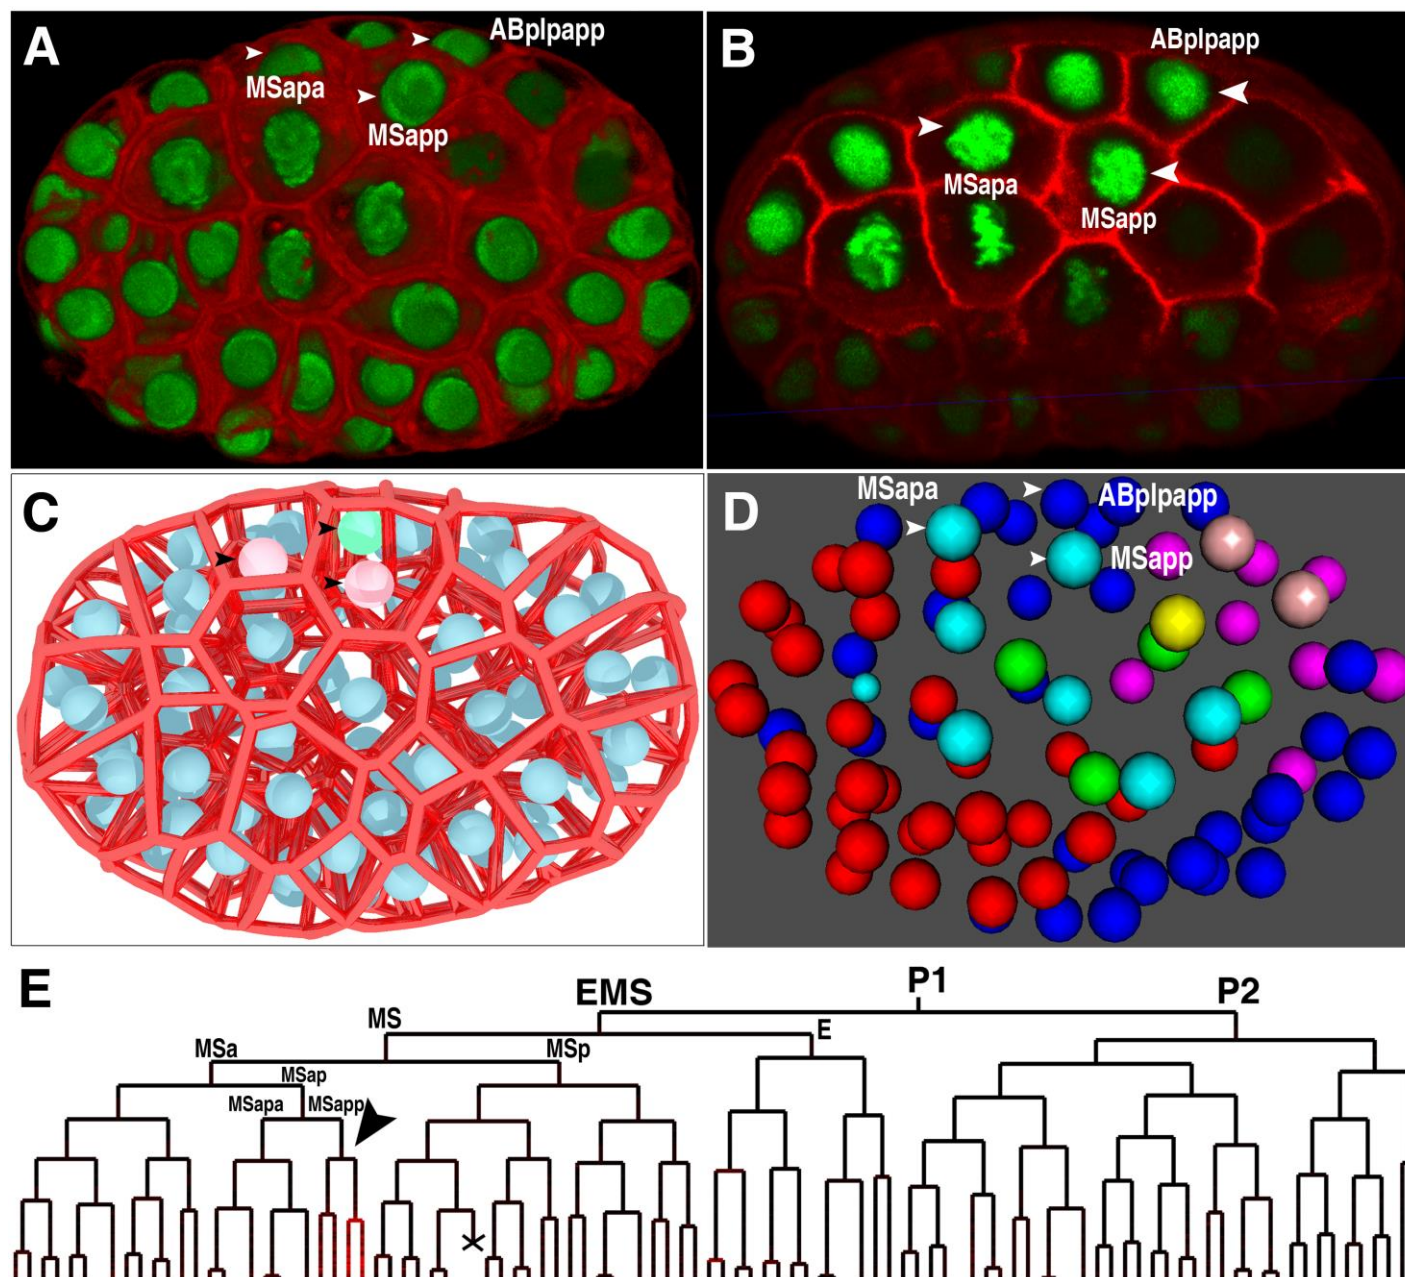

**Fig. 5**



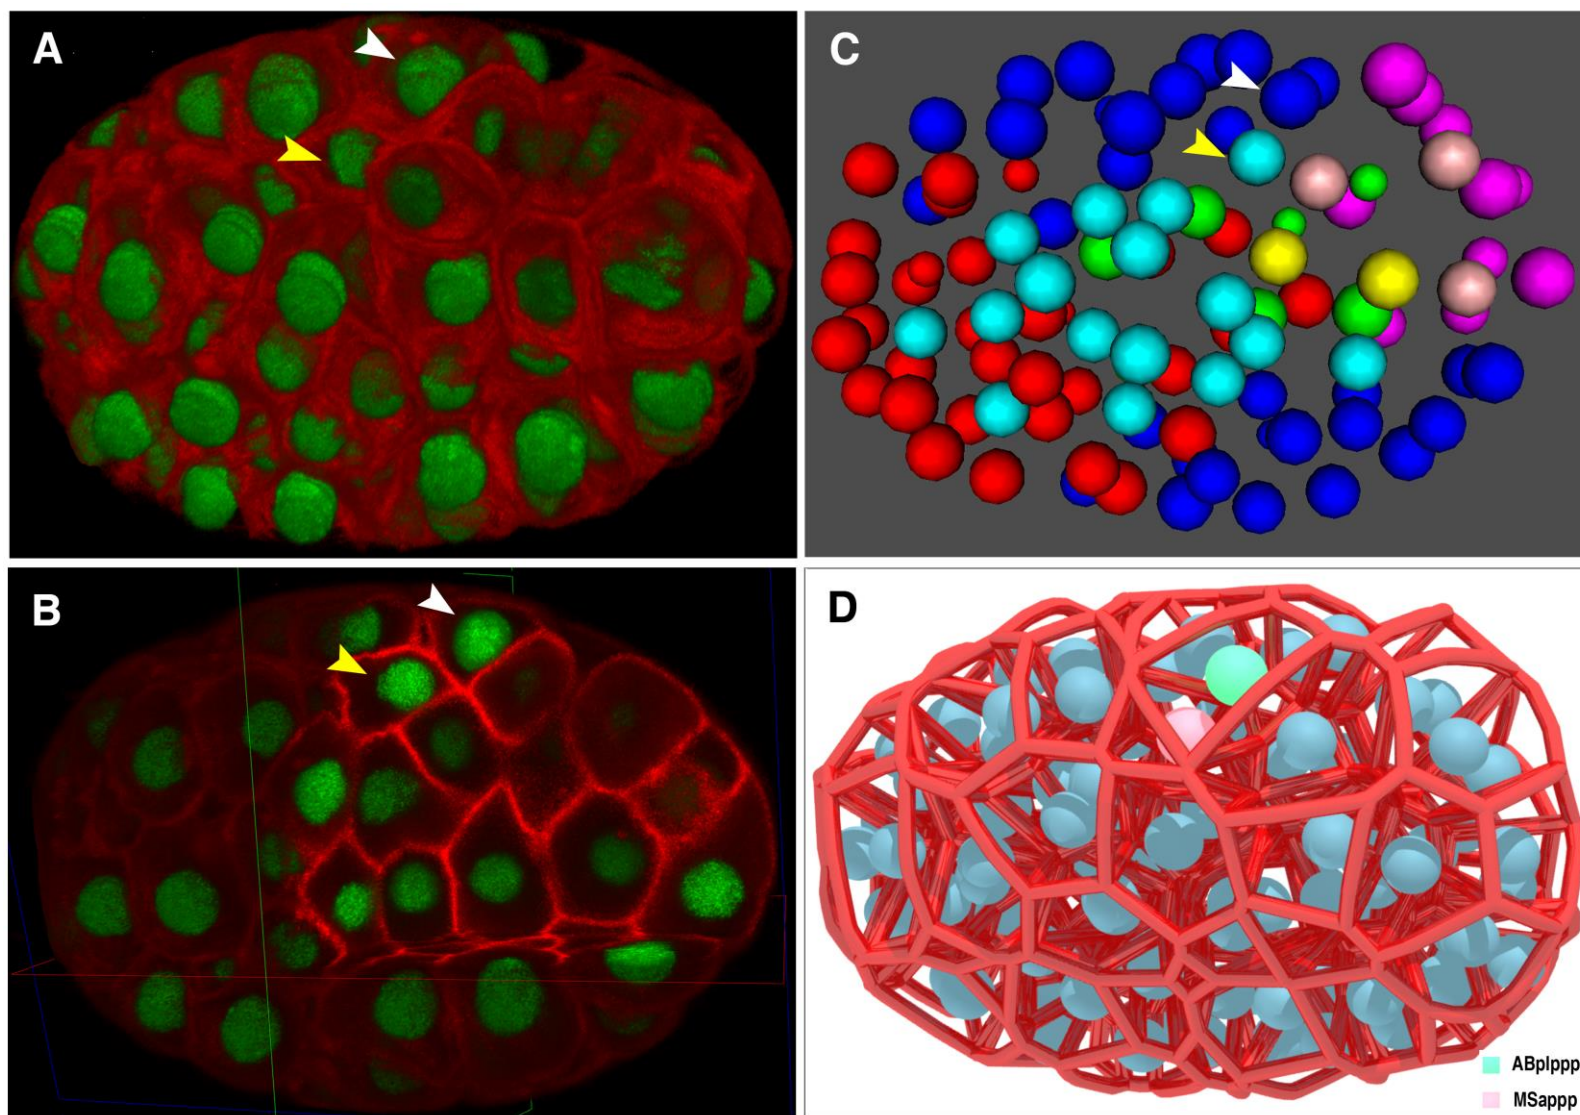

Fig. 6
